# Supplementary material for: A tug-of-war between electronic excitation and confinement in a dynamical context
Source: Royal Society of Chemistry journal article supplement (doi:10.1039/c1cp22862e), 2011-12-23
Supplement: c1cp22862e.pdf [file c1cp22862e.pdf]

## Supplementary Information

### A tug-of-war between electronic excitation and confinement in a dynamical context

Utpal Sarkar<sup>a</sup>, Munmun Khatua<sup>b</sup> and Pratim Kumar Chattaraj<sup>b\*</sup>

<sup>a</sup>Department of Physics, Assam University, Silchar-788011, India.

<sup>b</sup>Department of Chemistry and Center for Theoretical Studies,

Indian Institute of Technology, Kharagpur 721302, India.

\* Author for correspondence : email : [pkc@chem.iitkgp.ernet.in](mailto:pkc@chem.iitkgp.ernet.in)

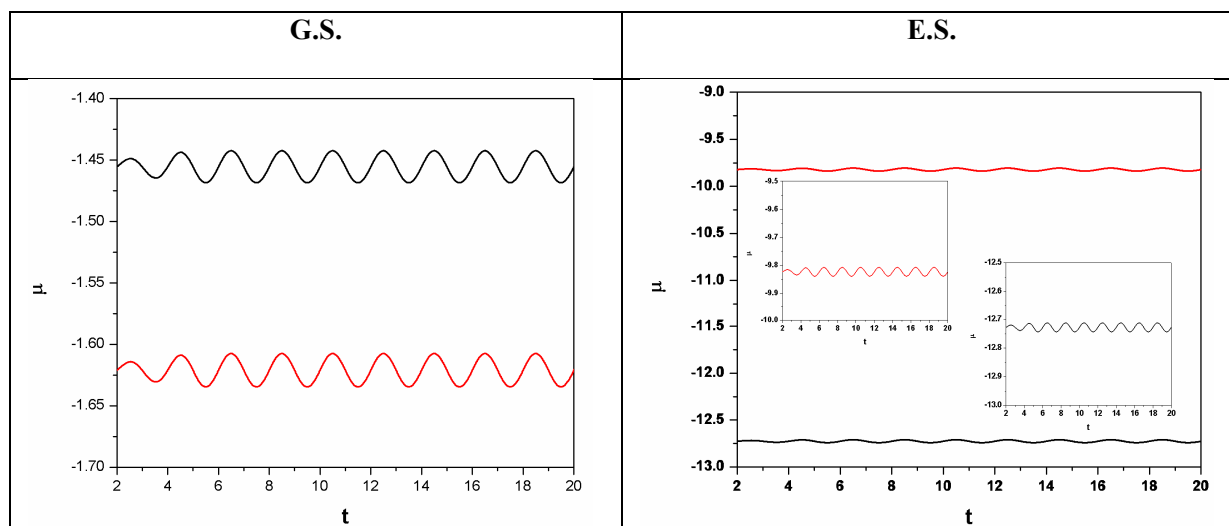

**Fig. S1.** Time evolution of chemical potential ( $\mu$ , in a.u.) when helium atom in ground state (G.S.) and excited state (E.S.) is placed in intense laser field. (Amplitude = 0.01 a.u.). Black line represents unconfined system and red line represents confined system. Weizsäcker and Fermi-Amaldi functionals are used in these cases.

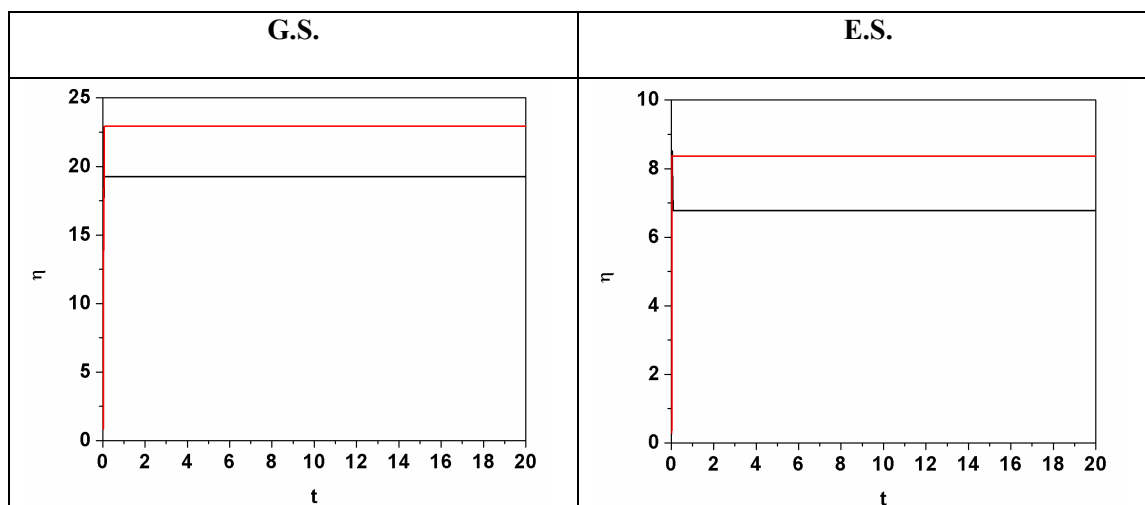

**Fig. S2.** Time evolution of chemical hardness ( $\eta$ , in a.u.) when helium atom in ground state (G.S.) and excited state (E.S.) is placed in intense laser field. (Amplitude = 0.01 a.u.). Black line represents unconfined system and red line represents confined system.

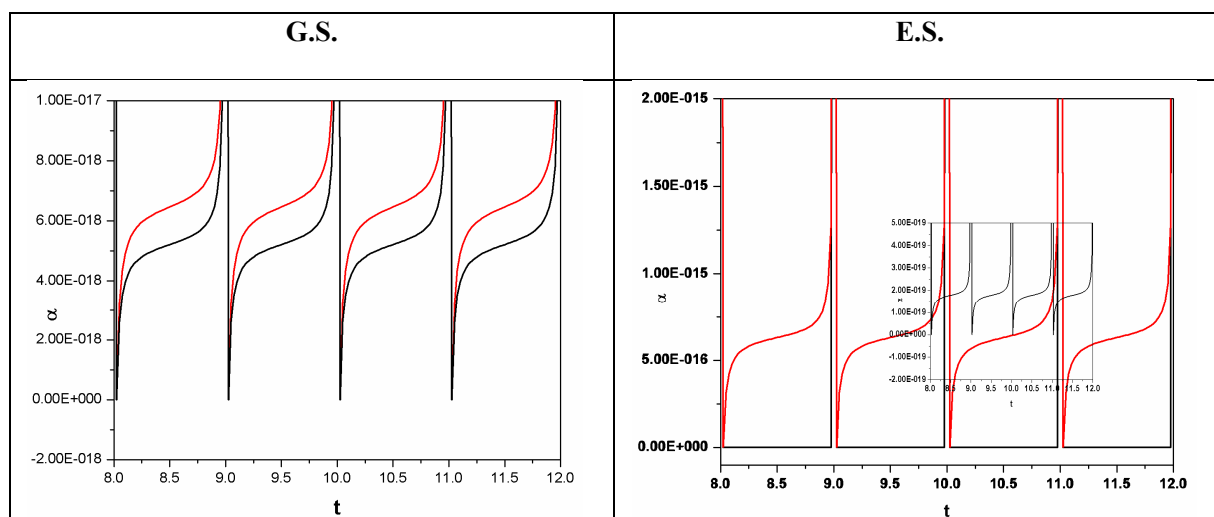

**Fig.S3.** Time evolution of polarizability ( $\alpha$ , in a.u.) when helium atom in ground state (G.S.) and excited state (E.S.) is placed in intense laser field. (Amplitude = 0.01 a.u.). Black line represents unconfined system and red line represents confined system.

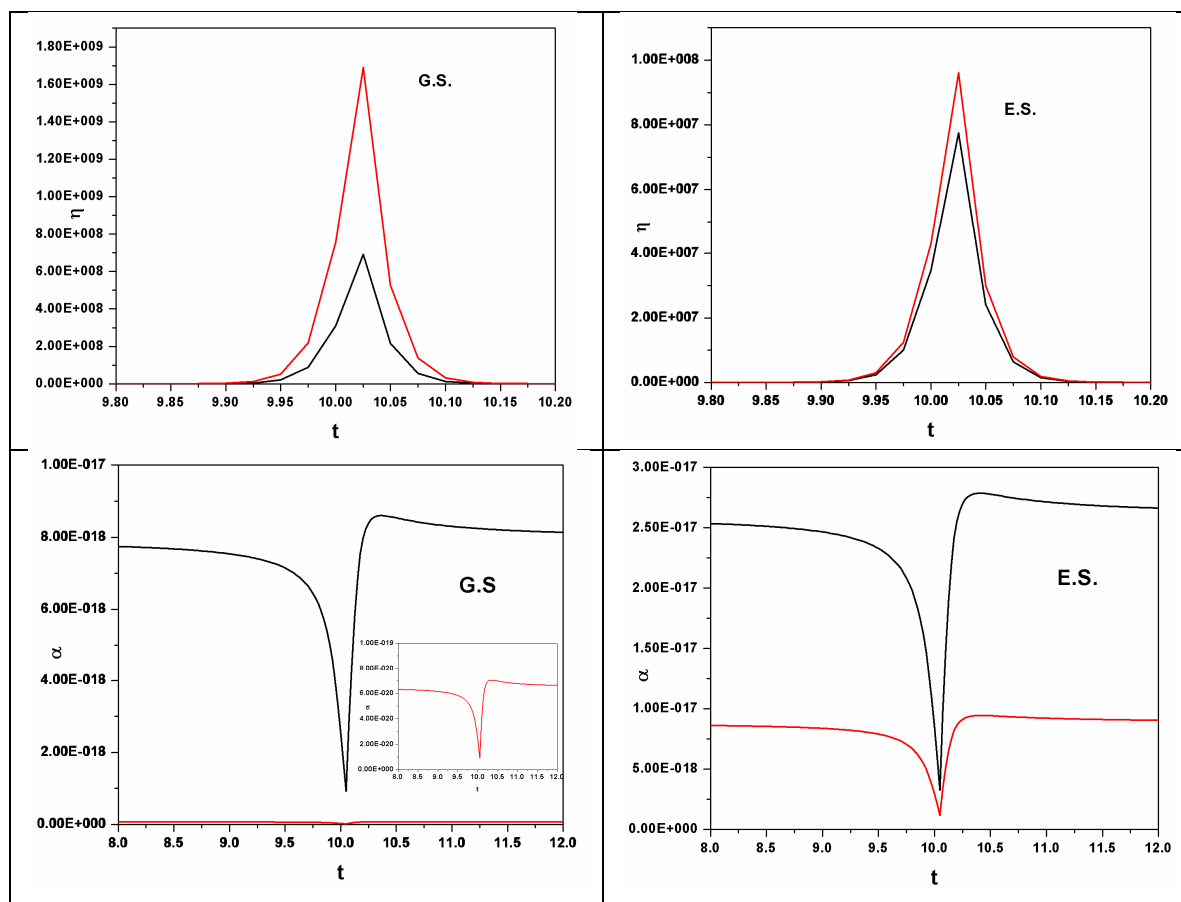

**Fig. S4.** Time evolution of hardness ( $\eta$ , in a.u.) and polarizability ( $\alpha$ , in a.u.) during a collision process between a proton and helium atom in ground state and excited state. Black line represents unconfined system and red line represents confined system.
